# Supplementary material for: Host Cell Transcriptome Profile during Wild-Type and Attenuated Dengue Virus Infection
Source: PubMed Central journal article supplement (PMC3597485; doi:10.1371/journal.pntd.0002107), 2013-03-14
Supplement: pntd.0002107.s001.pdf [file pntd.0002107.s001.pdf]

# RNA-seq Metrics

## Read Count Metrics

The following summary statistics are calculated by counting the number of reads that have the given characteristics.

### Total Reads

| Sample      | Note      | Total Purity Filtered Reads Sequenced | Alternative Alignments | Failed Vendor QC Check | Read Length | Estimated Library Size |
|-------------|-----------|---------------------------------------|------------------------|------------------------|-------------|------------------------|
| Control-NCC | 11May2012 | 43,428,578                            | 2,282,793              | NA                     | 79          | NA                     |
| Control-1   | 11May2012 | 203,062,932                           | 13,384,040             | NA                     | 74          | NA                     |
| Control-2   | 11May2012 | 201,509,835                           | 10,440,862             | NA                     | 74          | NA                     |
| 16007-NCC   | 11May2012 | 49,505,435                            | 2,686,125              | NA                     | 79          | NA                     |
| 16007-1     | 11May2012 | 177,008,876                           | 9,443,504              | NA                     | 74          | NA                     |
| 16007-2     | 11May2012 | 194,203,549                           | 9,434,638              | NA                     | 74          | NA                     |
| PDK13-NCC   | 11May2012 | 46,266,956                            | 2,146,382              | NA                     | 79          | NA                     |
| PDK13-1     | 11May2012 | 168,335,185                           | 6,907,404              | NA                     | 74          | NA                     |
| PDK13-2     | 11May2012 | 194,423,341                           | 8,691,098              | NA                     | 74          | NA                     |

**Total Purity Filtered Reads Sequenced** are filtered for vendor fail flags and exclude alternative alignment reads.

**Alternative Alignments** are duplicate read entries providing alternative coordinates. **Failed Vendor QC Check** are reads which have been designated as failed by the sequencer. **Read Length** is the maximum length found for all reads.

**Estimated Library Size** is the number of expected fragments based upon the total number of reads and duplication rate assuming a Poisson distribution.

### Mapped Reads

| Sample      | Note      | Mapped      | Mapping Rate | Mapped Unique | Mapped Unique Rate of Total | Unique Rate of Mapped | Duplication Rate of Mapped | Base Mismatch Rate | rRNA | rRNA rate |
|-------------|-----------|-------------|--------------|---------------|-----------------------------|-----------------------|----------------------------|--------------------|------|-----------|
| Control-NCC | 11May2012 | 43,428,578  | 1.000        | 43,428,578    | 1.000                       | 1.000                 | NA                         | 0.008              | NA   | NA        |
| Control-1   | 11May2012 | 203,062,932 | 1.000        | 203,062,932   | 1.000                       | 1.000                 | NA                         | 0.007              | NA   | NA        |
| Control-2   | 11May2012 | 201,509,835 | 1.000        | 201,509,835   | 1.000                       | 1.000                 | NA                         | 0.007              | NA   | NA        |
| 16007-NCC   | 11May2012 | 49,505,435  | 1.000        | 49,505,435    | 1.000                       | 1.000                 | NA                         | 0.005              | NA   | NA        |
| 16007-1     | 11May2012 | 177,008,876 | 1.000        | 177,008,876   | 1.000                       | 1.000                 | NA                         | 0.008              | NA   | NA        |
| 16007-2     | 11May2012 | 194,203,549 | 1.000        | 194,203,549   | 1.000                       | 1.000                 | NA                         | 0.006              | NA   | NA        |
| PDK13-NCC   | 11May2012 | 46,266,956  | 1.000        | 46,266,956    | 1.000                       | 1.000                 | NA                         | 0.005              | NA   | NA        |
| PDK13-1     | 11May2012 | 168,335,185 | 1.000        | 168,335,185   | 1.000                       | 1.000                 | NA                         | 0.006              | NA   | NA        |
| PDK13-2     | 11May2012 | 194,423,341 | 1.000        | 194,423,341   | 1.000                       | 1.000                 | NA                         | 0.006              | NA   | NA        |

**Mapped** reads are those that were aligned. **Mapping Rate** is per total reads. **Mapped Unique** are both aligned as well as

non-duplicate reads. **Mapped Unique Rate of Total** is per total reads. **Unique Rate of Mapped** are unique reads divided by all mapped reads. **Duplication Rate of Mapped** is the duplicate read divided by total mapped reads. **Base Mismatch Rate** is the number of bases not matching the reference divided by the total number of aligned bases. **rRNA** reads are non-duplicate and duplicate reads aligning to rRNA regions as defined in the transcript model definition. **rRNA Rate** is per total reads.

## Mate Pairs

| Sample      | Note      | Mapped Pairs | Unpaired Reads | End 1 Mapping Rate | End 2 Mapping Rate | End 1 Mismatch Rate | End 2 Mismatch Rate | Fragment Length Mean | Fragment Length StdDev | Chimeric Pairs |
|-------------|-----------|--------------|----------------|--------------------|--------------------|---------------------|---------------------|----------------------|------------------------|----------------|
| Control-NCC | 11May2012 | 19,835,158   | NA             | 1.017              | 0.983              | 0.008               | 0.008               | 130                  | 117                    | 330,988        |
| Control-1   | 11May2012 | 92,669,320   | NA             | 1.014              | 0.986              | 0.007               | 0.007               | 286                  | 293                    | 1,583,189      |
| Control-2   | 11May2012 | 90,116,306   | NA             | 1.018              | 0.982              | 0.007               | 0.007               | 285                  | 290                    | 1,375,358      |
| 16007-NCC   | 11May2012 | 22,802,757   | NA             | 1.010              | 0.990              | 0.005               | 0.005               | 125                  | 118                    | 405,403        |
| 16007-1     | 11May2012 | 78,177,347   | NA             | 1.026              | 0.974              | 0.008               | 0.009               | 277                  | 283                    | 1,055,545      |
| 16007-2     | 11May2012 | 87,986,654   | NA             | 1.014              | 0.986              | 0.006               | 0.007               | 292                  | 286                    | 1,163,151      |
| PDK13-NCC   | 11May2012 | 21,303,160   | NA             | 1.009              | 0.991              | 0.004               | 0.005               | 126                  | 116                    | 289,050        |
| PDK13-1     | 11May2012 | 77,122,597   | NA             | 1.009              | 0.991              | 0.005               | 0.006               | 298                  | 283                    | 833,538        |
| PDK13-2     | 11May2012 | 88,350,197   | NA             | 1.014              | 0.986              | 0.006               | 0.006               | 304                  | 287                    | 1,040,304      |

**Mapped Pairs** is the total number of pairs for which both ends map. **Unpaired Reads** are the number of reads that are lacking a mate. **End 1/2 Mapping Rate** is the number of mapped divided by the total number of End1/End2 reads. **End 1/2 Mismatch Rate** is the number of End 1 and 2 bases not matching the reference divided by the total number of mapped End 1 and 2 bases. **Fragment Length Mean/StdDev** is the mean distance, standard deviation between the start of an upstream read and the end of the downstream one. Only fragments contained within single exons are used. **Chimeric Pairs** are pairs whose mates map to different genes.

## Transcript-associated Reads

| Sample      | Note      | Intragenic Rate | Exonic Rate | Intronic Rate | Intergenic Rate | Expression Profiling Efficiency | Transcripts Detected | Genes Detected |
|-------------|-----------|-----------------|-------------|---------------|-----------------|---------------------------------|----------------------|----------------|
| Control-NCC | 11May2012 | 0.975           | 0.877       | 0.099         | 0.024           | 0.877                           | 91,003               | 20,318         |
| Control-1   | 11May2012 | 0.973           | 0.873       | 0.100         | 0.026           | 0.873                           | 101,120              | 24,366         |
| Control-2   | 11May2012 | 0.973           | 0.871       | 0.102         | 0.026           | 0.871                           | 102,545              | 24,896         |
| 16007-NCC   | 11May2012 | 0.961           | 0.807       | 0.154         | 0.039           | 0.807                           | 94,167               | 21,755         |
| 16007-1     | 11May2012 | 0.970           | 0.859       | 0.111         | 0.030           | 0.859                           | 102,653              | 25,067         |
| 16007-2     | 11May2012 | 0.970           | 0.860       | 0.110         | 0.029           | 0.860                           | 103,127              | 25,184         |
| PDK13-NCC   | 11May2012 | 0.966           | 0.830       | 0.136         | 0.034           | 0.830                           | 93,073               | 21,240         |
| PDK13-1     | 11May2012 | 0.973           | 0.868       | 0.105         | 0.027           | 0.868                           | 101,917              | 24,447         |
| PDK13-2     | 11May2012 | 0.971           | 0.865       | 0.106         | 0.029           | 0.865                           | 103,115              | 25,121         |

All of the above rates are per mapped read. **Intragenic Rate** refers to the fraction of reads that map within genes (within introns or exons). **Exonic Rate** is the fraction mapping within exons. **Intronic Rate** is the fraction mapping within introns. **Intergenic Rate** is the fraction mapping in the genomic space between genes. **Expression Profile Efficiency** is the ratio of

exon reads to total reads. **Transcripts/Genes Detected** is the number of transcripts/Genes with at least 5 reads.

## Strand Specificity

| Sample      | Note      | End 1 Sense | End 1 Antisense | End 2 Sense | End 2 Antisense | End 1 % Sense | End 2 % Sense |
|-------------|-----------|-------------|-----------------|-------------|-----------------|---------------|---------------|
| Control-NCC | 11May2012 | 9,341,434   | 9,687,271       | 9,184,603   | 9,204,740       | 49.091        | 49.945        |
| Control-1   | 11May2012 | 43,906,705  | 44,562,293      | 42,565,561  | 43,362,294      | 49.629        | 49.536        |
| Control-2   | 11May2012 | 43,785,825  | 45,045,034      | 42,534,315  | 43,075,409      | 49.291        | 49.684        |
| 16007-NCC   | 11May2012 | 10,401,221  | 10,852,632      | 10,313,746  | 10,528,029      | 48.938        | 49.486        |
| 16007-1     | 11May2012 | 38,922,976  | 39,768,493      | 37,115,313  | 37,507,323      | 49.463        | 49.737        |
| 16007-2     | 11May2012 | 41,963,715  | 43,231,407      | 41,405,368  | 41,476,743      | 49.256        | 49.957        |
| PDK13-NCC   | 11May2012 | 9,818,472   | 10,217,006      | 9,766,692   | 9,906,265       | 49.005        | 49.645        |
| PDK13-1     | 11May2012 | 36,496,356  | 37,299,198      | 36,239,050  | 36,202,751      | 49.456        | 50.025        |
| PDK13-2     | 11May2012 | 42,298,318  | 43,198,275      | 41,354,005  | 41,798,849      | 49.474        | 49.733        |

**End 1/2 Sense** are the number of End 1 or 2 reads that were sequenced in the sense direction. Similarly, **End 1/2 Antisense** are the number of End 1 or 2 reads that were sequenced in the antisense direction. **End 1/2 Sense %** are percentages of intragenic End 1/2 reads that were sequenced in the sense direction.

## Correlation Analysis

### Spearman Correlation Matrix

| Sample      | Note      | Control-NCC | Control-1 | Control-2 | 16007-NCC | 16007-1 | 16007-2 | PDK13-NCC | PDK13-1 | PDK13-2 |
|-------------|-----------|-------------|-----------|-----------|-----------|---------|---------|-----------|---------|---------|
| Control-NCC | 11May2012 | 1.000       | 0.984     | 0.978     | 0.981     | 0.974   | 0.975   | 0.970     | 0.962   | 0.960   |
| Control-1   | 11May2012 | 0.984       | 1.000     | 0.982     | 0.984     | 0.981   | 0.980   | 0.971     | 0.965   | 0.966   |
| Control-2   | 11May2012 | 0.978       | 0.982     | 1.000     | 0.978     | 0.986   | 0.988   | 0.968     | 0.974   | 0.972   |
| 16007-NCC   | 11May2012 | 0.981       | 0.984     | 0.978     | 1.000     | 0.978   | 0.980   | 0.977     | 0.967   | 0.967   |
| 16007-1     | 11May2012 | 0.974       | 0.981     | 0.986     | 0.978     | 1.000   | 0.990   | 0.976     | 0.982   | 0.985   |
| 16007-2     | 11May2012 | 0.975       | 0.980     | 0.988     | 0.980     | 0.990   | 1.000   | 0.977     | 0.983   | 0.984   |
| PDK13-NCC   | 11May2012 | 0.970       | 0.971     | 0.968     | 0.977     | 0.976   | 0.977   | 1.000     | 0.980   | 0.980   |
| PDK13-1     | 11May2012 | 0.962       | 0.965     | 0.974     | 0.967     | 0.982   | 0.983   | 0.980     | 1.000   | 0.990   |
| PDK13-2     | 11May2012 | 0.960       | 0.966     | 0.972     | 0.967     | 0.985   | 0.984   | 0.980     | 0.990   | 1.000   |

### Pearson Correlation Matrix

| Sample      | Note      | Control-NCC | Control-1 | Control-2 | 16007-NCC | 16007-1 | 16007-2 | PDK13-NCC | PDK13-1 | PDK13-2 |
|-------------|-----------|-------------|-----------|-----------|-----------|---------|---------|-----------|---------|---------|
| Control-NCC | 11May2012 | 1.000       | 0.988     | 0.981     | 0.981     | 0.978   | 0.979   | 0.972     | 0.967   | 0.966   |
| Control-1   | 11May2012 | 0.988       | 1.000     | 0.986     | 0.986     | 0.985   | 0.984   | 0.975     | 0.971   | 0.972   |
| Control-2   | 11May2012 | 0.981       | 0.986     | 1.000     | 0.980     | 0.990   | 0.992   | 0.972     | 0.980   | 0.979   |
| 16007-NCC   | 11May2012 | 0.981       | 0.986     | 0.980     | 1.000     | 0.981   | 0.982   | 0.978     | 0.970   | 0.971   |
| 16007-1     | 11May2012 | 0.978       | 0.985     | 0.990     | 0.981     | 1.000   | 0.994   | 0.979     | 0.987   | 0.989   |
| 16007-2     | 11May2012 | 0.979       | 0.984     | 0.992     | 0.982     | 0.994   | 1.000   | 0.980     | 0.988   | 0.988   |

|           |           |       |       |       |       |       |       |       |       |       |
|-----------|-----------|-------|-------|-------|-------|-------|-------|-------|-------|-------|
| PDK13-NCC | 11May2012 | 0.972 | 0.975 | 0.972 | 0.978 | 0.979 | 0.980 | 1.000 | 0.982 | 0.982 |
| PDK13-1   | 11May2012 | 0.967 | 0.971 | 0.980 | 0.970 | 0.987 | 0.988 | 0.982 | 1.000 | 0.994 |
| PDK13-2   | 11May2012 | 0.966 | 0.972 | 0.979 | 0.971 | 0.989 | 0.988 | 0.982 | 0.994 | 1.000 |

## Coverage Metrics for Bottom 1000 Expressed Transcripts

The metrics in this table are calculated across the transcripts that were determined to have the highest expression levels.

| Sample                      | Note      | Mean Per Base Cov. | Mean CV | No. Covered 5' | 5'200Base Norm | No. Covered 3' | 3' 200Base Norm | Num. Gaps | Cumul. Gap Length | Gap % |
|-----------------------------|-----------|--------------------|---------|----------------|----------------|----------------|-----------------|-----------|-------------------|-------|
| <a href="#">Control-NCC</a> | 11May2012 | 4.10               | 1.23    | 639            | 0.66           | 494            | 5371            | 596330    | 29.4              |       |
| <a href="#">Control-1</a>   | 11May2012 | 17.19              | 1.16    | 797            | 0.60           | 717            | 2967            | 237245    | 12.6              |       |
| <a href="#">Control-2</a>   | 11May2012 | 17.29              | 1.10    | 795            | 0.69           | 736            | 2680            | 308114    | 14.3              |       |
| <a href="#">16007-NCC</a>   | 11May2012 | 4.49               | 1.11    | 670            | 0.58           | 557            | 4710            | 452755    | 24.1              |       |
| <a href="#">16007-1</a>     | 11May2012 | 15.11              | 1.09    | 755            | 0.49           | 724            | 3016            | 257142    | 13.0              |       |
| <a href="#">16007-2</a>     | 11May2012 | 16.60              | 1.08    | 798            | 0.67           | 750            | 2950            | 256240    | 13.1              |       |
| <a href="#">PDK13-NCC</a>   | 11May2012 | 4.19               | 1.09    | 627            | 0.62           | 550            | 4664            | 470199    | 24.4              |       |
| <a href="#">PDK13-1</a>     | 11May2012 | 14.35              | 1.10    | 785            | 0.80           | 716            | 2998            | 276035    | 15.2              |       |
| <a href="#">PDK13-2</a>     | 11May2012 | 16.74              | 1.04    | 779            | 0.53           | 775            | 2440            | 192543    | 10.8              |       |

It is important to note that these values are restricted to the bottom 1000 expressed transcripts. **5'** and **3'** values are per-base coverage averaged across all top transcripts. 5' and 3' ends are 200 base pairs. Gap % is the total cumulative gap length divided by the total cumulative transcript lengths.

## Coverage Metrics for Middle 1000 Expressed Transcripts

The metrics in this table are calculated across the transcripts that were determined to have the highest expression levels.

| Sample                      | Note      | Mean Per Base Cov. | Mean CV | No. Covered 5' | 5'200Base Norm | No. Covered 3' | 3' 200Base Norm | Num. Gaps | Cumul. Gap Length | Gap % |
|-----------------------------|-----------|--------------------|---------|----------------|----------------|----------------|-----------------|-----------|-------------------|-------|
| <a href="#">Control-NCC</a> | 11May2012 | 29.80              | 0.94    | 828            | 0.45           | 767            | 2098            | 172239    | 8.2               |       |
| <a href="#">Control-1</a>   | 11May2012 | 128.27             | 0.96    | 900            | 0.42           | 900            | 1054            | 70326     | 3.7               |       |
| <a href="#">Control-2</a>   | 11May2012 | 128.67             | 0.89    | 911            | 0.42           | 902            | 966             | 72575     | 3.9               |       |
| <a href="#">16007-NCC</a>   | 11May2012 | 30.97              | 0.88    | 835            | 0.40           | 836            | 1801            | 133199    | 6.4               |       |
| <a href="#">16007-1</a>     | 11May2012 | 116.38             | 0.90    | 887            | 0.40           | 917            | 1042            | 68918     | 3.6               |       |
| <a href="#">16007-2</a>     | 11May2012 | 126.81             | 0.85    | 898            | 0.39           | 921            | 995             | 66709     | 3.4               |       |
| <a href="#">PDK13-NCC</a>   | 11May2012 | 31.53              | 0.88    | 808            | 0.37           | 811            | 2040            | 150957    | 7.2               |       |
| <a href="#">PDK13-1</a>     | 11May2012 | 120.82             | 0.89    | 899            | 0.42           | 895            | 1094            | 79204     | 4.0               |       |
| <a href="#">PDK13-2</a>     | 11May2012 | 134.90             | 0.87    | 901            | 0.37           | 931            | 944             | 58402     | 2.9               |       |

It is important to note that these values are restricted to the middle 1000 expressed transcripts. **5'** and **3'** values are per-base coverage averaged across all top transcripts. 5' and 3' ends are 200 base pairs. Gap % is the total cumulative gap length divided by the total cumulative transcript lengths.

## Coverage Metrics for Top 1000 Expressed Transcripts

The metrics in this table are calculated across the transcripts that were determined to have the highest expression levels.

| Sample                      | Note      | Mean Per Base Cov. | Mean CV | No. Covered 5' | 5'200Base Norm | No. Covered 3' | 3' 200Base Norm | Num. Gaps | Cumul. Gap Length | Gap % |
|-----------------------------|-----------|--------------------|---------|----------------|----------------|----------------|-----------------|-----------|-------------------|-------|
| <a href="#">Control-NCC</a> | 11May2012 | -255.12            | 0.83    | 923            | 0.29           | 960            | 488             | 38655     | 3.2               |       |
| <a href="#">Control-1</a>   | 11May2012 | 238.83             | 0.86    | 950            | 0.28           | 991            | 234             | 21126     | 1.8               |       |
| <a href="#">Control-2</a>   | 11May2012 | -632.09            | 0.78    | 974            | 0.29           | 988            | 191             | 18729     | 1.6               |       |
| <a href="#">16007-NCC</a>   | 11May2012 | -83.94             | 0.80    | 934            | 0.32           | 965            | 405             | 31491     | 2.6               |       |
| <a href="#">16007-1</a>     | 11May2012 | 389.07             | 0.78    | 941            | 0.27           | 990            | 234             | 21559     | 1.7               |       |
| <a href="#">16007-2</a>     | 11May2012 | 1487.80            | 0.73    | 971            | 0.30           | 988            | 209             | 18826     | 1.5               |       |
| <a href="#">PDK13-NCC</a>   | 11May2012 | -687.43            | 0.74    | 915            | 0.30           | 982            | 411             | 31585     | 2.5               |       |
| <a href="#">PDK13-1</a>     | 11May2012 | 1521.96            | 0.74    | 956            | 0.31           | 986            | 204             | 19339     | 1.5               |       |
| <a href="#">PDK13-2</a>     | 11May2012 | -194.78            | 0.73    | 946            | 0.30           | 990            | 201             | 19151     | 1.5               |       |

It is important to note that these values are restricted to the top 1000 expressed transcripts. **5'** and **3'** values are per-base coverage averaged across all top transcripts. 5' and 3' ends are 200 base pairs. Gap % is the total cumulative gap length divided by the total cumulative transcript lengths.

---

## Mean Coverage

### Low Expressed

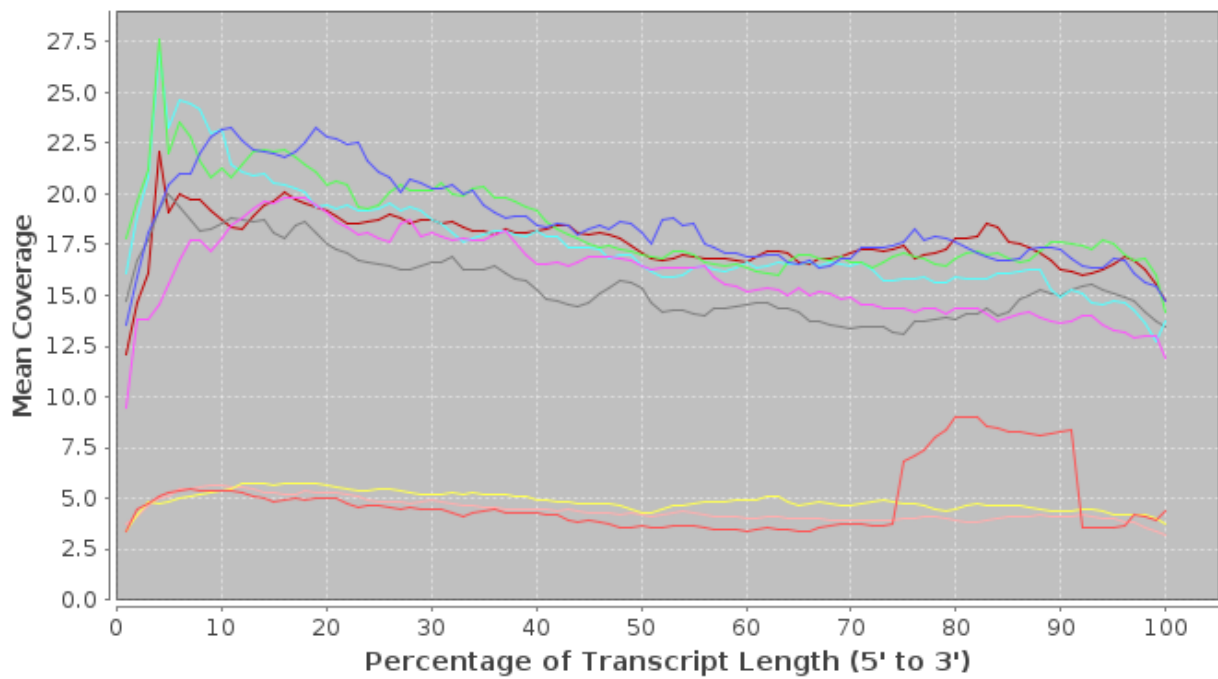

### Medium Expressed

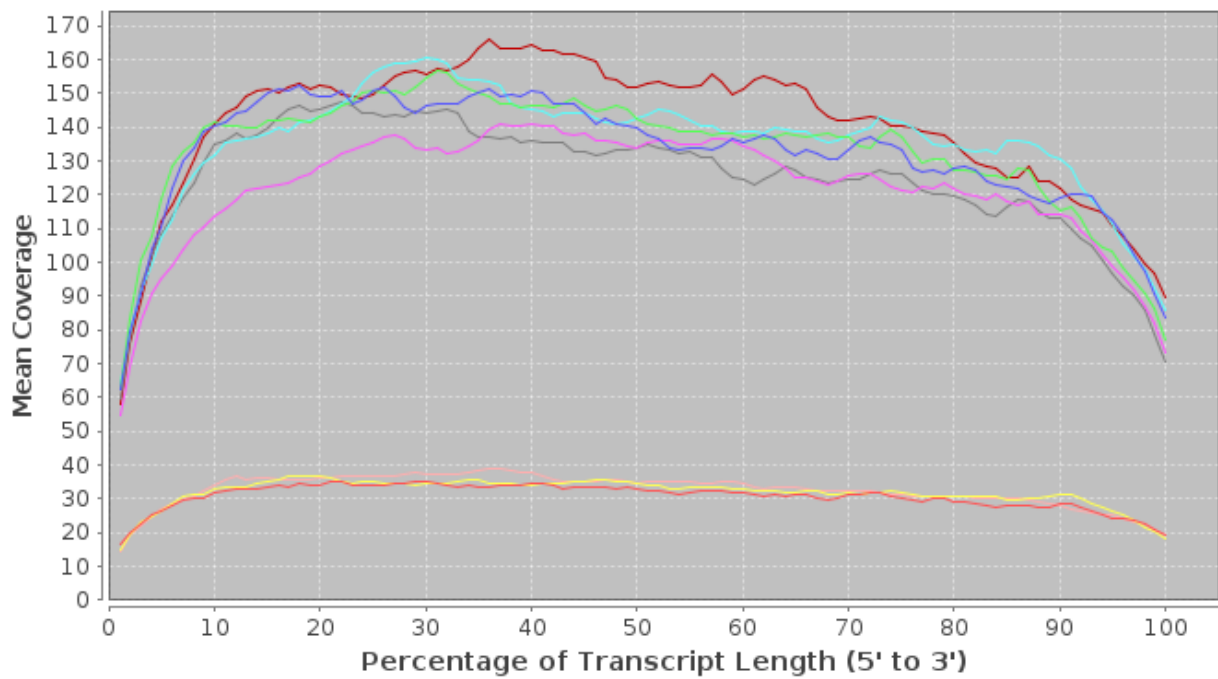

### High Expressed

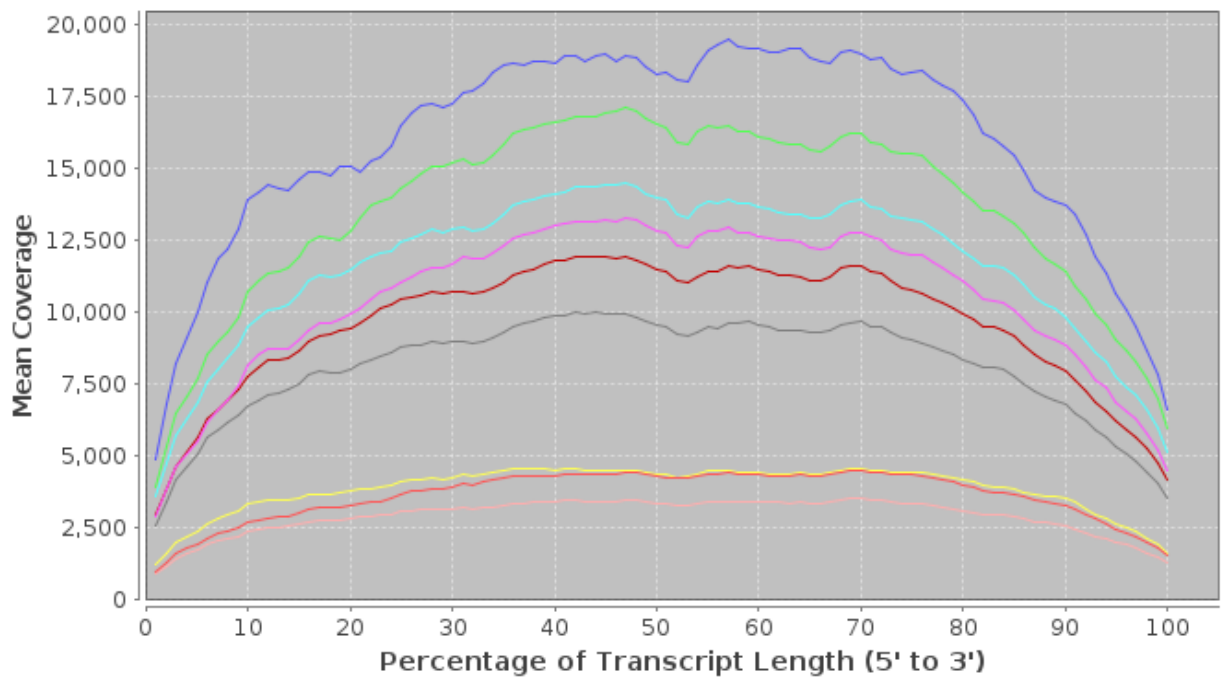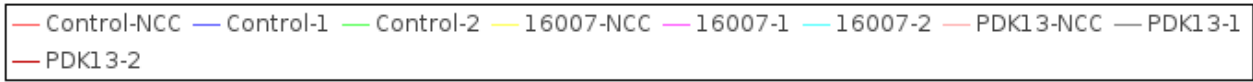

### Mean Coverage from 3' End

#### Low Expressed

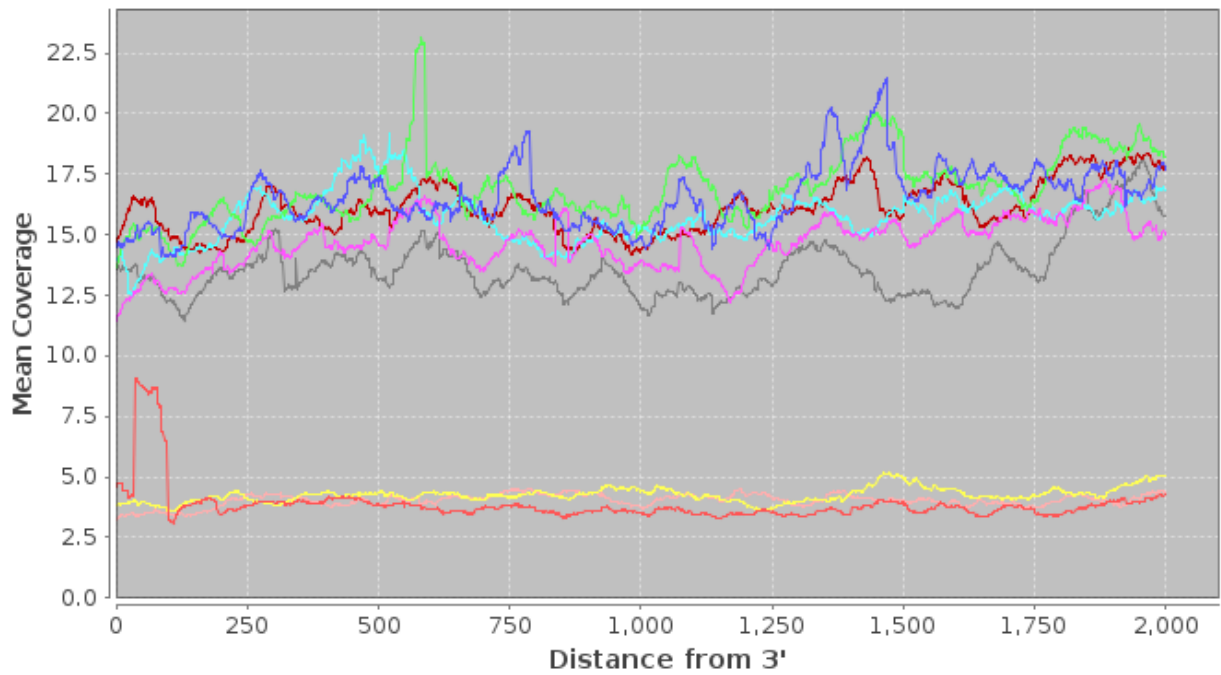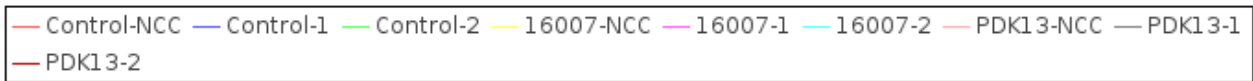

#### Medium Expressed

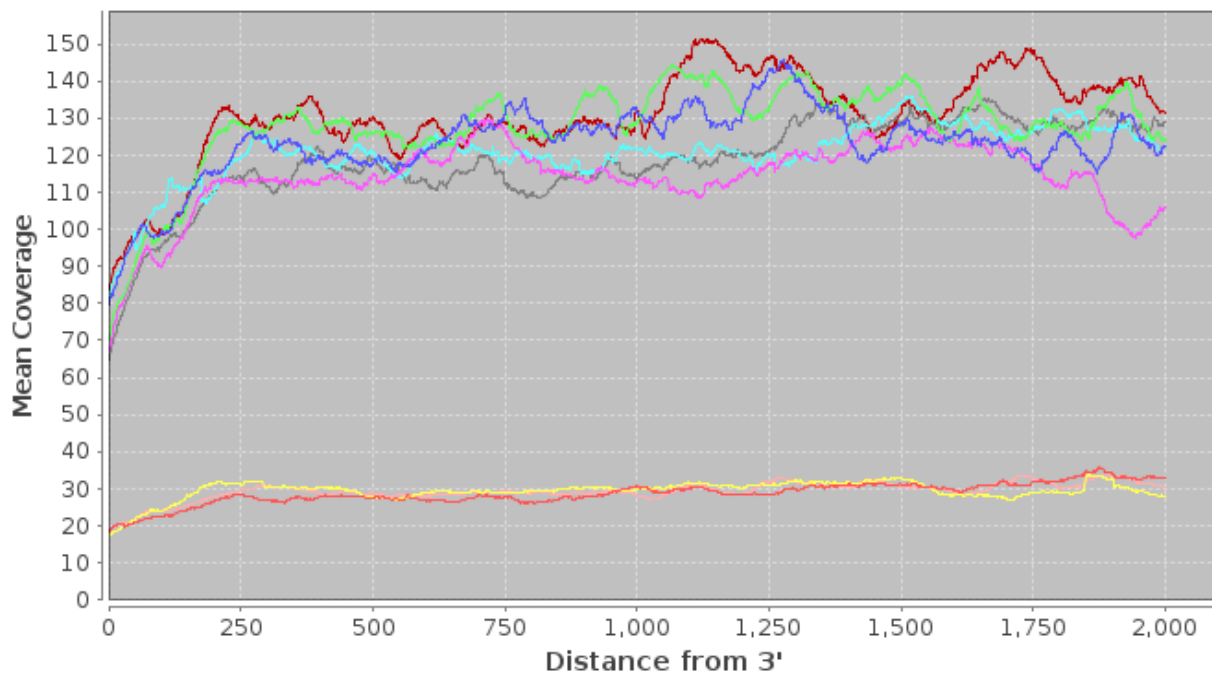

### High Expressed

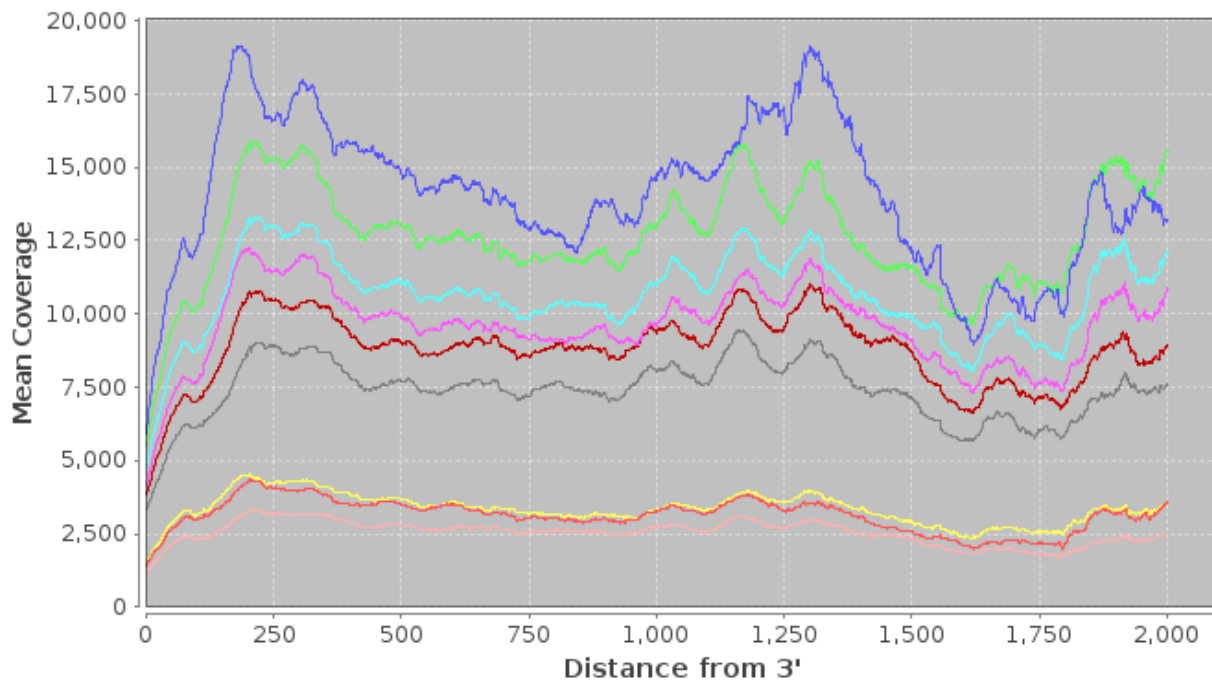

### GC Stratification

- [High GC](#)
- [Moderate GC](#)
- [Low GC](#)

### Files



| File                                                  | Description                                                                                                 |
|-------------------------------------------------------|-------------------------------------------------------------------------------------------------------------|
| <a href="#">Metrics Tab Separated Value File</a>      | Text file containing all the metrics of the report in a single tab delimited file.                          |
| <a href="#">Mean Coverage Plot Data - Low Expr</a>    | Text file containing the data for mean coverage plot by position for low expression coverage                |
| <a href="#">Mean Coverage Plot Data - Medium Expr</a> | Text file containing the data for mean coverage plot by position for medium expression coverage             |
| <a href="#">Mean Coverage Plot Data - High Expr</a>   | Text file containing the data for mean coverage plot by position for high expression coverage               |
| <a href="#">Mean Coverage Plot Data - Low Expr</a>    | Text file containing the data for mean coverage plot by distance from 3' end for low expression coverage    |
| <a href="#">Mean Coverage Plot Data - Medium Expr</a> | Text file containing the data for mean coverage plot by distance from 3' end for medium expression coverage |
| <a href="#">Mean Coverage Plot Data - High Expr</a>   | Text file containing the data for mean coverage plot by distance from 3' end for high expression coverage   |
| <a href="#">Mean Coverage Plot Data - Low Expr</a>    | Text file containing the data for gap length counts for low expression coverage                             |
| <a href="#">Mean Coverage Plot Data - Medium Expr</a> | Text file containing the data for gap length counts for medium expression coverage                          |
| <a href="#">Mean Coverage Plot Data - High Expr</a>   | Text file containing the data for gap length counts for high expression coverage                            |

## Summary of Runtime Parameters

| Option           | Description                                                                      | Value                           |
|------------------|----------------------------------------------------------------------------------|---------------------------------|
| Samples          | Samples/Sample File used                                                         | BAM_Files-v5.list               |
| Transcript Model | GTF formatted file containing the transcript definitions                         | hg19-ensembl_UCSC-corrected.gtf |
| Reference Genome | The genome version to which the BAM is aligned                                   | hg19_Sorted.fa                  |
| Downsampling     | For Coverage Metrics, the number of reads is randomly reduced to the given level | none                            |
| Detailed Report  | The optional detailed report contains coverage metrics for every transcript      | no details                      |
| rRNA Intervals   | Genomic coordinates of rRNA loci                                                 | human_all_rRNA.fasta            |

Generated by [RNA-SeQC v1.1.7](#) 05/14/12

Run on Fri May 25 02:15:58 SGT 2012
